# Supplementary material for: Abnormalities of Peripheral Lymphocyte Subsets in Rheumatoid Arthritis Patients Complicated with Osteoporosis
Source: Springer Nature journal article supplement (doi:10.1007/s40744-022-00452-x), 2022-05-02
Supplement: MOESM1 [file 24440108]

## SUPPLEMENTARY MATERIAL

### **Abnormalities of peripheral lymphocyte subsets in rheumatoid arthritis patients complicated with osteoporosis**

*Ting Cheng<sup>1,2</sup>, Sheng-Xiao Zhang<sup>1,2</sup>, Jia Wang<sup>1,2</sup>, Jun Qiao<sup>1,2</sup>, Min-Jing Chang<sup>3</sup>, Hong-Qing Niu<sup>1,2</sup>,  
Guang-Ying Liu<sup>1</sup>, Xiao-Feng Li<sup>1,2\*</sup>*

<sup>1</sup> *Department of Rheumatology, The Second Hospital of Shanxi Medical University; Taiyuan, China;*

<sup>2</sup> *Key Laboratory of Cellular Physiology at Shanxi Medical University, Ministry of Education; Taiyuan, China;*

<sup>3</sup> *School of Management, Shanxi Medical University; Taiyuan, China.*

**\*Corresponding author:**

*Xiao-Feng Li Ph. D. & Prof.*

*Department of Rheumatology, The Second Hospital of Shanxi Medical University*

*Taiyuan, Shanxi, China*

*E-mail address: [lxf\\_9859@sxmu.edu.cn](mailto:lxf_9859@sxmu.edu.cn)*

**Supplementary Table 1. Absolute numbers and proportions of peripheral lymphocyte subsets among HC(A), RA-non-OP(B) and RA-OP(C) group**

|                                    | HC (A)<br>(n=117)    | RA-non-OP (B)<br>(n=557) | RA-OP (C)<br>(n=220) | <i>P</i><br>A vs. B | <i>P</i> <sub>2</sub><br>A vs. C | <i>P</i> <sub>3</sub><br>B vs. C |
|------------------------------------|----------------------|--------------------------|----------------------|---------------------|----------------------------------|----------------------------------|
| T (cell/ $\mu$ L)                  | 1230.03 $\pm$ 309.08 | 1203.86 $\pm$ 490.04     | 1184.79 $\pm$ 542.26 | 0.595               | 0.415                            | 0.621                            |
| T (%)                              | 69.59 $\pm$ 6.68     | 70.74 $\pm$ 9.83         | 72.15 $\pm$ 9.73     | 0.232               | <b>0.018</b>                     | 0.062                            |
| B (cell/ $\mu$ L)                  | 203.65 $\pm$ 83.34   | 198.78 $\pm$ 121.79      | 178.75 $\pm$ 134.70  | 0.692               | <b>0.022</b>                     | <b>0.038</b>                     |
| B (%)                              | 11.54 $\pm$ 3.81     | 11.85 $\pm$ 5.49         | 10.82 $\pm$ 5.96     | 0.579               | 0.245                            | <b>0.018</b>                     |
| NK (cell/ $\mu$ L)                 | 304.42 $\pm$ 144.91  | 255.13 $\pm$ 178.81      | 236.27 $\pm$ 149.88  | <b>0.004</b>        | <b>&lt;0.001</b>                 | 0.159                            |
| NK (%)                             | 17.04 $\pm$ 6.48     | 15.39 $\pm$ 9.05         | 15.11 $\pm$ 8.79     | 0.062               | 0.053                            | 0.691                            |
| CD8 <sup>+</sup> T (cell/ $\mu$ L) | 450.60 $\pm$ 166.05  | 432.74 $\pm$ 225.25      | 423.83 $\pm$ 232.79  | 0.426               | 0.289                            | 0.612                            |
| CD8 <sup>+</sup> T (%)             | 25.56 $\pm$ 7.21     | 25.53 $\pm$ 9.17         | 26.04 $\pm$ 8.79     | 0.974               | 0.639                            | 0.475                            |
| Th1 (cell/ $\mu$ L)                | 95.78 $\pm$ 70.57    | 113.81 $\pm$ 100.00      | 110.52 $\pm$ 94.14   | 0.063               | 0.176                            | 0.665                            |
| Th1 (%)                            | 19.58 $\pm$ 23.63    | 15.90 $\pm$ 10.98        | 15.75 $\pm$ 10.29    | <b>0.006</b>        | <b>0.011</b>                     | 0.889                            |
| Th2 (cell/ $\mu$ L)                | 8.79 $\pm$ 5.78      | 8.75 $\pm$ 7.25          | 9.93 $\pm$ 10.09     | 0.961               | 0.210                            | 0.063                            |
| Th2 (%)                            | 1.60 $\pm$ 1.35      | 1.30 $\pm$ 1.03          | 1.50 $\pm$ 1.30      | <b>0.011</b>        | 0.438                            | <b>0.032</b>                     |
| Th17 (cell/ $\mu$ L)               | 6.44 $\pm$ 5.06      | 7.33 $\pm$ 5.69          | 8.40 $\pm$ 7.73      | 0.154               | <b>0.006</b>                     | <b>0.031</b>                     |
| Th17 (%)                           | 1.12 $\pm$ 0.88      | 1.10 $\pm$ 0.78          | 1.34 $\pm$ 1.42      | 0.851               | 0.054                            | <b>0.003</b>                     |
| Treg (cell/ $\mu$ L)               | 34.25 $\pm$ 16.22    | 30.42 $\pm$ 18.95        | 26.44 $\pm$ 16.28    | <b>0.036</b>        | <b>&lt;0.001</b>                 | <b>0.006</b>                     |
| Treg (%)                           | 6.56 $\pm$ 5.90      | 4.44 $\pm$ 2.09          | 4.02 $\pm$ 2.11      | <b>&lt;0.001</b>    | <b>&lt;0.001</b>                 | 0.065                            |
| Th1/Th2                            | 15.24 $\pm$ 21.50    | 18.09 $\pm$ 17.83        | 16.65 $\pm$ 17.78    | 0.126               | 0.503                            | 0.322                            |
| Th17/Treg                          | 0.20 $\pm$ 0.15      | 0.31 $\pm$ 0.36          | 0.46 $\pm$ 0.92      | <b>0.044</b>        | <b>&lt;0.001</b>                 | <b>0.001</b>                     |

Results are expressed by the mean  $\pm$  standard deviation. Statistics: one-way analysis of variance.

RA: rheumatoid arthritis; OP: osteoporosis; T: T cells; B: B cells; NK: natural killer cells; CD8<sup>+</sup>T: CD8<sup>+</sup>T cells; Th1:

T helper 1 cells; Th2: T helper 2 cells; Th17: T helper 17 cells; Treg: regulatory T cells; Th1/Th2: T helper 1 cells/ T helper 2 cells ratio; Th17/Treg: T helper 17 cells/regulatory T cells ratio.
